## Research Article

# Prognostic roles of the transcriptional expression of exportins in hepatocellular carcinoma

Lubiao Chen<sup>1,\*</sup>,  Yanlin Huang<sup>1,4,\*</sup>, Liang Zhou<sup>3,\*</sup>,  Yifan Lian<sup>4</sup>, Jialiang Wang<sup>4</sup>, Dongmei Chen<sup>4</sup>, Huan Wei<sup>4</sup>, Mingsheng Huang<sup>2</sup> and Yuehua Huang<sup>1,4</sup>

<sup>1</sup>Department of Infectious Diseases, The Third Affiliated Hospital of Sun Yat-sen University, Guangzhou, China; <sup>2</sup>Department of Interventional Radiology, The Third Affiliated Hospital of Sun Yat-sen University, Guangzhou, China; <sup>3</sup>Department of Critical Care Medicine, The First Affiliated Hospital of Guangzhou Medical University, Guangzhou, China; <sup>4</sup>Guangdong Provincial Key Laboratory of Liver Disease Research, The Third Affiliated Hospital of Sun Yat-sen University, Guangzhou, China

**Correspondence:** Yuehua Huang (huangyh53@mail.sysu.edu.cn) or Mingsheng Huang (huangmsh@mail.sysu.edu.cn)

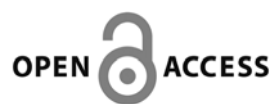

**Aims:** A large number of studies have suggested that exportins (XPOs) play a pivotal role in human cancers. In the present study, we analyzed XPO mRNA expression in cancer tissues and explored their prognostic value in hepatocellular carcinoma (HCC).

**Methods:** Transcriptional and survival data related to XPO expression in HCC patients were obtained through the ONCOMINE and UALCAN databases. Survival analysis plots were drawn with Gene Expression Profiling Interactive Analysis (GEPIA). Sequence alteration data for XPOs were obtained from The Cancer Genome Atlas (TCGA) database and c-BioPortal. Gene functional enrichment analyses were performed with Database for Annotation, Visualization and Integrated Discovery (DAVID).

**Results:** Compared with normal liver tissues, significant XPO mRNA overexpression was observed in HCC cancer tissues. There was a trend of higher XPO expression in more advanced clinical stages and lower differentiated pathological grades of HCC. In HCC patients, high expression of XPO1, CSE1L, XPOT, XPO4/5/6 was related to poor overall survival (OS), and XPO1, CSE1L and XPO5/6 were correlated with poor disease-free survival (DFS). The main genetic alterations in XPOs involved mRNA up-regulation, DNA amplification and deletion. General XPO mutations were remarkably associated with worse OS and mostly affected the pathways of RNA transport and oocyte meiosis.

**Conclusion:** High expression of XPOs was associated with a poor prognosis in HCC patients. XPOs may be exploited as good prognostic biomarkers for survival in HCC patients.

## Introduction

Hepatocellular carcinoma (HCC) was the sixth most frequently diagnosed cancer and the fourth leading cause of cancer-related deaths worldwide in 2018, with almost 841000 new cases and 782000 deaths annually [1]. Although treatments including surgical resection, liver transplantation, radiofrequency or microwave ablation, transarterial chemoembolization and tyrosine kinase inhibitors (sorafenib, lenvatinib etc.) have been applied, the 5-year overall survival (OS) of HCC patients has not significantly improved [2]. The high mortality of HCC may be attributed to a delayed diagnosis and highly malignant biological behavior, including remote or intrahepatic metastasis, portal vein cancer thrombosis and intrahepatic bile duct obstruction [3,4]. A large number of investigations have explored the development and progression of HCC. However, to date, the molecular characteristics of HCC remain elusive. Identifying tumor pathogenesis in HCC is pivotal for revealing the mechanisms of hepatocarcinogenesis and will be helpful in developing effective therapies.

The trafficking of macromolecules through the nuclear envelope is essential for signal transduction and the regulation of a multitude of biological pathways. Defective nuclear transport may lead to changes in

\*These authors contributed equally to this work.

Received: 03 April 2019

Revised: 18 July 2019

Accepted: 29 July 2019

Accepted Manuscript Online:  
01 August 2019

Version of Record published:  
19 August 2019

the physiological levels and space-time location of tumor suppressor genes and oncogenes, which might be ultimately associated with cellular differentiation and tumorigenesis [5–7]. The genes that undertake the tasks of shuttling cargo proteins from the cytoplasm into the nucleus by  $\beta$ -importins and from the nucleus out to the cytoplasm by exportins have been identified as those in the karyopherin- $\beta$  family [8,9]. An overall study on different karyopherin- $\beta$  family members in HCC would help reveal the molecular mechanism of the occurrence and development of HCC and provide insight into a new prognostic and therapeutic target for this deadly disease.

To date, seven exportins (XPOs) have been identified in humans and are encoded by XPO genes [10]. All of them take part in the transport of proteins/peptides and DNAs/RNAs from the nucleus out to the cytoplasm [7]. These exportins share common characteristics, with similar molecular weights (95–145 kDa), acid isoelectric points (4.0–5.5), low sequence identity (<20%) and helical HEAT repeats [11]. Previous studies have found the aberrant expression and prognostic values of some members of the XPO family in various cancers. For instance, XPO1 was identified as a key gene that plays a critical role in HCC by dynamic transcriptome analysis [12]. Consistent with these results, Zheng et al. [13] reported that XPO1 was overexpressed in HCC tissues compared with normal liver tissue. XPOT (also named as XPO3) was up-regulated in HCC tissues, and its overexpression was associated with poor OS. Further evidence suggested that XPOT might affect tumor progression via the cell cycle and ubiquitin-mediated proteolysis [14]. In contrast, Liang et al. found that the mRNA levels of XPO4 were down-regulated in liver cancerous tissues compared with paracancerous tissues, and this down-regulation predicted a poor prognosis [15,16]. Correspondingly, Li et al. [17] reported that XPO5 functioned as a cancer suppressor in the development and progression of HCC. Therefore, the roles of distinct XPO family members in HCC need to be further clarified.

In the present study, we addressed these issues by analyzing the expression of and mutations in different XPO members in patients with HCC. We also investigated the predictive functions of mutations in XPOs. Our results suggested that XPO family members have a significant impact on HCC progression. Therefore, XPOs could be used as potential biomarkers for predicting prognosis in HCC patients.

## Materials and methods

### ONCOMINE database analysis

The online cancer microarray database (ONCOMINE, <http://www.oncomine.org>) for gene expression was utilized in the present study. Data regarding the transcriptional mRNA expression of XPOs between HCC cancer samples and corresponding normal liver samples were obtained from this database. The differences were compared by using Student's *t* test, and the statistical analysis parameters were set as follows: *P*-value <0.05, fold change = 1.5, gene rank = 10% and data type is mRNA [18].

### UALCAN analysis

UALCAN (<http://ualcan.path.uab.edu>) is an interactive web source based on level 3 RNA-seq and clinical data from 31 cancer types in The Cancer Genome Atlas (TCGA) database. UALCAN provides web resources for cancer researchers and clinicians to analyze the relative expression of potential genes in cancer and normal samples, to obtain the relative clinicopathological parameters, to draw survival analysis plotters, to estimate the impact of gene expression level and clinicopathological parameters on patient survival, and to identify novel genes in various individual cancer types [19]. Differences in transcriptional expression were compared by Student's *t* test and a *P*-value <0.05 was considered statistically significant. The expression level was normalized as transcripts per million (TPM) reads for comparison across groups and individuals.

### Gene Expression Profiling Interactive Analysis

Gene Expression Profiling Interactive Analysis (GEPIA, <http://gepia.cancer-pku.cn>), an online cancer microarray database, was used to analyze the impact of the XPO family on the OS and disease-free survival (DFS) of HCC patients. Patients were divided into high expression and low expression groups according to the median expression level and assessed by Kaplan–Meier curves [20]. A *P*-value <0.05 was considered statistically significant.

### TCGA database analysis

TCGA (<https://cancergenome.nih.gov/>), a comprehensive and coordinated project aiming at improving diagnosis methods, treatment criteria and ultimately preventing cancer, had been assisting users to analyze large groups of over 30 human tumors through its genome analysis technologies, including large-scale genome sequencing and pathological data analysis [21].

**Table 1 Significantly up-regulated expression in the transcription levels of XPOs between HCC and normal liver tissues (ONCOMINE database)**

| XPO   | HCC vs. Normal | Fold change | P-value   | t test | Datasets/References   |
|-------|----------------|-------------|-----------|--------|-----------------------|
| XPO1  | HCC            | 1.642       | 2.27e-09* | 7.439  | Roessler liver [24]   |
|       | HCC            | 1.683       | 9.79e-54* | 17.772 | Roessler liver 2 [24] |
|       | HCC            | 1.782       | 2.65e-07* | 7.72   | Wurmbach liver [25]   |
| CSE1L | HCC            | 2.209       | 2.02e-08* | 7.087  | Roessler liver        |
|       | HCC            | 2.188       | 2.77e-75* | 23.12  | Roessler liver 2      |
|       | HCC            | 1.914       | 2.16e-05* | 4.613  | Wurmbach liver        |
| XPOT  | HCC            | -2.482      | 4.27e-06* | -6.763 | Chen liver [26]       |
|       | HCC            | 2.445       | 8.41e-63* | 19.922 | Roessler liver 2      |
|       | HCC            | 1.763       | 4.01e-14* | 8.11   | Chen liver            |
| XPO4  | N/A            | N/A         | N/A       | N/A    | N/A                   |
|       | HCC            | -2.122      | 4.32e-07* | -6.069 | Mas liver [27]        |
| XPO5  | HCC            | 1.758       | 3.80e-13* | 7.735  | Chen liver            |
|       | HCC            | 2.125       | 1.02e-05* | 5.498  | Wurmbach liver        |
| XPO6  | N/A            | N/A         | N/A       | N/A    | N/A                   |
| XPO7  | N/A            | N/A         | N/A       | N/A    | N/A                   |

Abbreviation: N/A, not available.

\* $P < 0.05$  was considered statistically significant.

## c-BioPortal database analysis

c-BioPortal ([www.cbioportal.org](http://www.cbioportal.org)) is an online open access resource for exploring, visualizing and analyzing multidimensional cancer genomics data. In the present study, c-BioPortal was used to access Liver Hepatocellular Carcinoma (TCGA, Provisional) data. The selected genomic profiles contained mutations, putative copy number alterations from GISTIC and mRNA expression z-Scores (RNASeq V2 RSEM). Seven target XPO family members were automatically calculated using a Z-score  $\pm 2.0$ . OncoPrint, OS or DFS plotter were obtained according to the online instructions at c-BioPortal [22].

## Gene Ontology and Kyoto Encyclopedia of Genes and Genomes pathway enrichment analyses

The Database for Annotation, Visualization and Integrated Discovery (DAVID, <https://david.ncifcrf.gov/>) was used to perform Gene Ontology (GO) and Kyoto Encyclopedia of Genes and Genomes (KEGG) analyses of all seven XPO genes. The human genome was selected as the background parameter. A  $P$ -value  $< 0.05$  was set as the threshold to indicate a statistically significant difference [23].

## Results

### High transcriptional expression of XPOs in HCC

To explore the expression of XPOs in HCC cancer tissue, the ONCOMINE and UALCAN databases were used to analyze their mRNA levels. As shown in Figure 1 and Table 1, compared with normal liver tissues, XPO1 mRNA levels exhibited a 1.642-fold (Roessler liver dataset [24],  $P = 2.27e-09$ ), 1.683-fold (Roessler liver 2 dataset [24],  $P = 9.79e-54$ ) and 1.782-fold (Wurmbach liver dataset [25],  $P = 2.65e-07$ ) increase in HCC cancer tissues. CSE1L (also named as XPO2) was also found to be 2.209-fold (Roessler liver dataset [24],  $P = 2.02e-08$ ), 2.218-fold (Roessler liver 2 dataset [24],  $P = 2.77e-75$ ) and 1.914-fold (Wurmbach liver dataset [25],  $P = 2.16e-05$ ) increased in HCC cancer tissues. In contrast, a -2.482-fold decrease in CSE1L mRNA levels was found in another HCC study (Chen Liver dataset [26],  $P = 4.27e-06$ ). Likewise, XPOT mRNA levels increased 2.245-fold (Roessler liver dataset [24],  $P = 8.41e-63$ ) and 1.763-fold (Chen liver dataset [26],  $P = 4.01e-14$ ) but decreased -2.122-fold in HCC cancer tissues in another HCC dataset (Mas liver dataset [27],  $P = 4.32e-07$ ). Similarly, the XPO5 mRNA level was increased 1.758-fold (Chen liver dataset [26],  $P = 3.80e-13$ ) and 2.215-fold (Wurmbach liver dataset [25],  $P = 1.02e-05$ ). However, the histopathological type of the other two datasets in XPO1 and one dataset in CSE1L was not HCC (Figure 1); thus, their results were not listed in Table 1. Next, the mRNA expression patterns of seven XPOs were measured by UALCAN, resources of which were based upon level 3 RNA-seq and clinical data from 31 cancer types of the TCGA database. As shown in Figure 2, significantly higher mRNA expression levels of all XPOs were found in primary HCC cancer tissues compared with

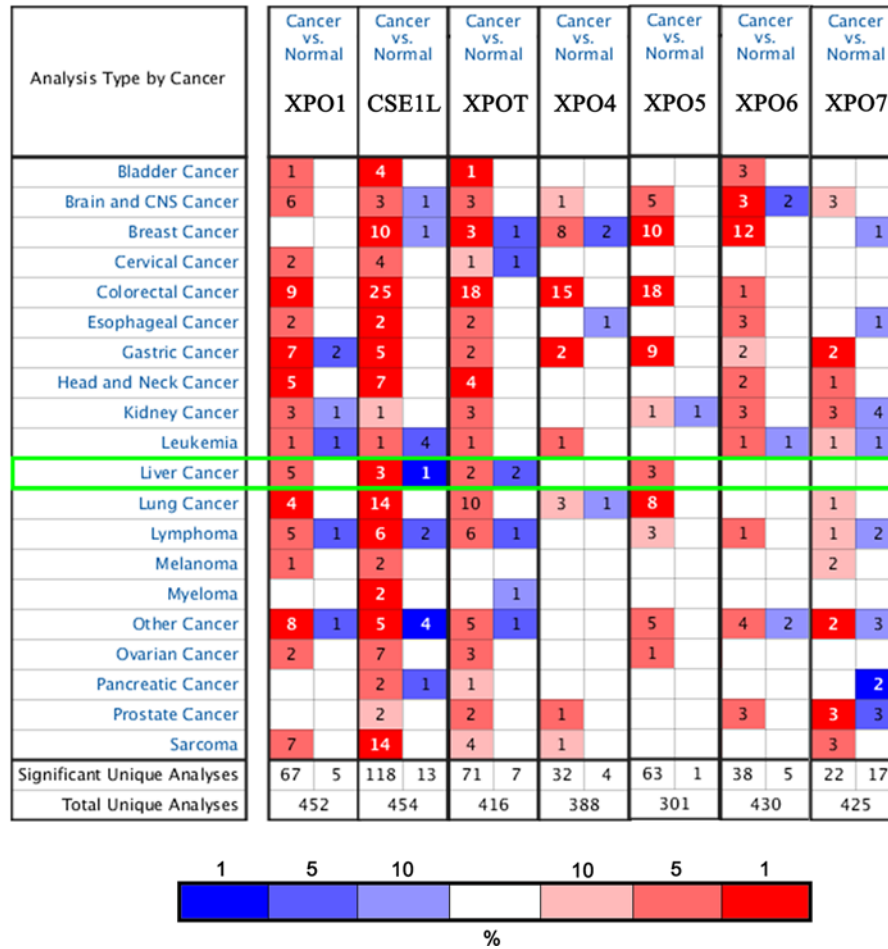

**Figure 1. XPO gene expression in 20 different cancer types**

XPOs mRNA expression (cancer tissue vs. normal tissue) was analyzed using the ONCOMINE database. The numbers in colored cells show the quantities of datasets with statistically significant mRNA overexpression (red) or underexpression (blue) of target genes. Cell colors were determined by the best gene rank percentile for the analysis within cells. Analysis conditions required the following thresholds: gene rank percentile (10%), *P*-value (0.05) and fold change (1.5).

normal liver tissues (*P*<0.05). Taken together, these results implied that the transcriptional expression of XPOs is up-regulated in HCC cancer tissues.

### Correlation between XPO transcription with HCC clinicopathological parameters

We next analyzed the relationship between XPO mRNA transcription levels and the clinicopathological parameters of HCC patients by UALCAN. As shown in Figure 3, the mRNA expression levels of all seven XPO family members were remarkably correlated with the patients' individual HCC clinical stage. The highest mRNA expression of an XPO was found at stage 3 instead of stage 4. The reason for this observation may be the small number of patients at stage 4 (only six patients). In addition, the mRNA expression of seven XPOs was significantly related to tumor pathological grade (Figure 4). The higher mRNA expression levels of XPOs tended to correlate with a more undifferentiated pathological grade. Noticeably, the mRNA expression levels of CSE1L and XPOT/6 were highest in tumor pathological grade 4 (Figure 4B,C,F), while the highest mRNA expression levels of XPO1/4/5/7 were found in grade 3 (Figure 4A,D,E,G). In short, these results suggested that the transcriptional levels of seven XPO members are significantly related to clinicopathological parameters in HCC patients.

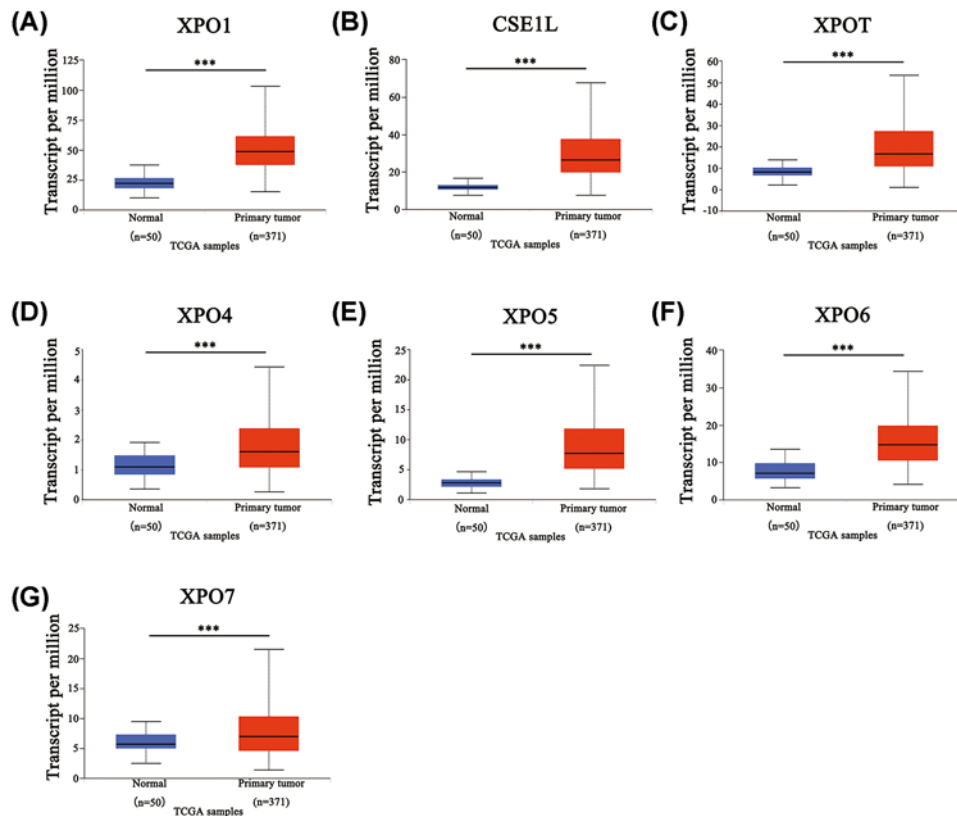

**Figure 2. Transcription levels of XPOs in HCC cancer tissues and normal liver tissues**

Expression panels for XPO1 (A), CSE1L (B), XPOT (C), XPO4 (D), XPO5 (E), XPO6 (F), and XPO7 (G) comparing the data between 50 normal individuals and 371 HCC patients in the TCGA database. \*\*\* $P < 0.001$ .

## Prognostic values of XPO mRNA levels in HCC

Furthermore, the open online tool GEPIA was used to analyze the prognostic values of XPOs in HCC patients. As shown in Figure 5, higher mRNA expression levels of XPO1 ( $P=0.0037$ ), CSE1L ( $P=0.0067$ ), XPOT ( $P=0.0079$ ), XPO4 ( $P=0.0068$ ), XPO5 ( $P=1.8e-05$ ) and XPO6 ( $P=0.0024$ ) predicted worse OS. However, XPO7 mRNA expression showed no significant association with OS ( $P=0.08$ , borderline significance). The results in Figure 6 showed that higher mRNA expression levels of XPO1 ( $P=0.047$ ), CSE1L ( $P=0.0048$ ), XPO5 ( $P=1.8e-7$ ) and XPO6 ( $P=0.026$ ) were associated with short DFS in HCC patients, but higher mRNA expression levels of XPOT ( $P=0.26$ ), XPO4 ( $P=0.51$ ) and XPO7 ( $P=0.052$ , borderline significance) were irrelevant to DFS. Thus, the mRNA expression levels of XPO1, CSE1L, XPOT, XPO4/5/6 are significantly associated with the prognosis of HCC patients.

## XPO genetic alterations and their association with HCC prognosis

To further explore the sequence mutations in XPO family members in HCC patients, the TCGA database and the c-BioPortal website were applied. As shown in Figure 7A, a high frequency of mutations was found in XPOs (44%, 158 of 360 HCC patients). The highest mutation rate was observed in XPO7 (46/360, 13%) compared with XPO1 (24/360, 7%), CSE1L (34/360, 9%), XPOT (28/360, 8%), XPO4 (28/360, 8%), XPO5 (24/360, 7%) and XPO6 (28/360, 8%). The main genetic alterations involved mRNA up-regulation in XPO1 (17/24, 70.8%), CSE1L (32/34, 94.1%), XPOT (25/28, 89.3%), XPO4 (23/28, 82.1%) and XPO6 (20/28, 71.4%), DNA amplification in XPO5 (21/24, 87.5%) and XPO6 (20/28, 71.4%) and DNA deletion in XPO7 (21/46, 45.65%). The Kaplan–Meier plot and log-rank test showed that HCC patients with XPO alterations had worse OS (Figure 7B,  $P=0.00271$ ), but this situation was not the same for DFS (Figure 7C,  $P=0.0949$ ). These results implied that sequence alterations in XPOs are related to the prognosis of patients with HCC.

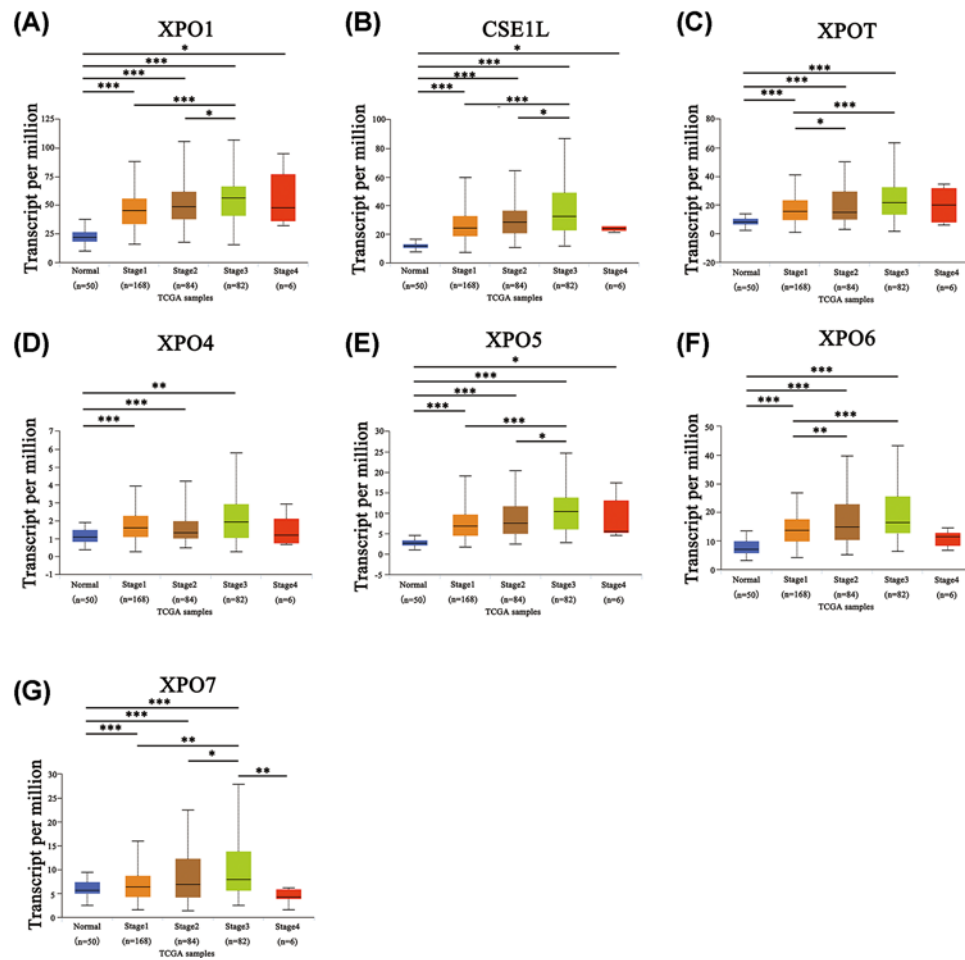

**Figure 3. Relationship between XPO mRNA expression and HCC clinical stage**

Expression panels for XPO1 (A), CSE1L (B), XPOT (C), XPO4 (D), XPO5 (E), XPO6 (F), and XPO7 (G) based on HCC cancer clinical stage comparing the data between 50 normal individuals and 371 HCC patients in the TCGA database. \* $P < 0.05$ ; \*\* $P < 0.01$ ; \*\*\* $P < 0.001$ .

## Network analysis of signaling pathways affected by XPO mutations in HCC

After analyzing the XPOs' genetic alterations and their prognostic values in HCC patients, the 50 neighboring genes related to the XPO mutants were analyzed, and an integrated network was constructed on c-BioPortal. As expected, RAD21, NUP133, RRM2B, PPP2CB, YWHAZ and 45 other genes were significantly associated with XPO mutations (Figure 8A). The functions of the XPOs and their alteration-related genes were analyzed by GO, KEGG and DAVID. GO analysis mainly includes three aspects: biological process, cellular components and molecular functions. Regarding the biological process (Figure 8B), the results showed that GO:0006606 (protein import into the nucleus), GO:0006405 (RNA export from the nucleus), GO:0006611 (protein export from the nucleus), GO:0051301 (cell division) and GO:0000972 (transcription-dependent) were highly associated with XPO sequence alterations in HCC. For cellular components (Figure 8C), GO:0031080 (nuclear pore outer ring), GO:0031965 (nuclear membrane), GO:0000776 (kinetochore), GO:0005643 (nuclear pore) and GO:0034339 (nuclear periphery) were remarkably regulated by XPO alterations. For molecular function (Figure 8D), GO:0017056 (structural constituent of the nuclear pore), GO:0005049 (nuclear export signal receptor activity), GO:0005487 (nucleocytoplasmic transporter activity) and GO:0008536 (Ran GTPase binding) were also closely related to XPO alterations. KEGG analysis showed that cfa03013 (RNA transport), cfa04114 (oocyte meiosis), cfa04390 (hippo signaling pathway), cfa04110 (cell cycle) and cfa03015 (mRNA surveillance pathway) were influenced by XPO mutations in HCC (Figure 8E).

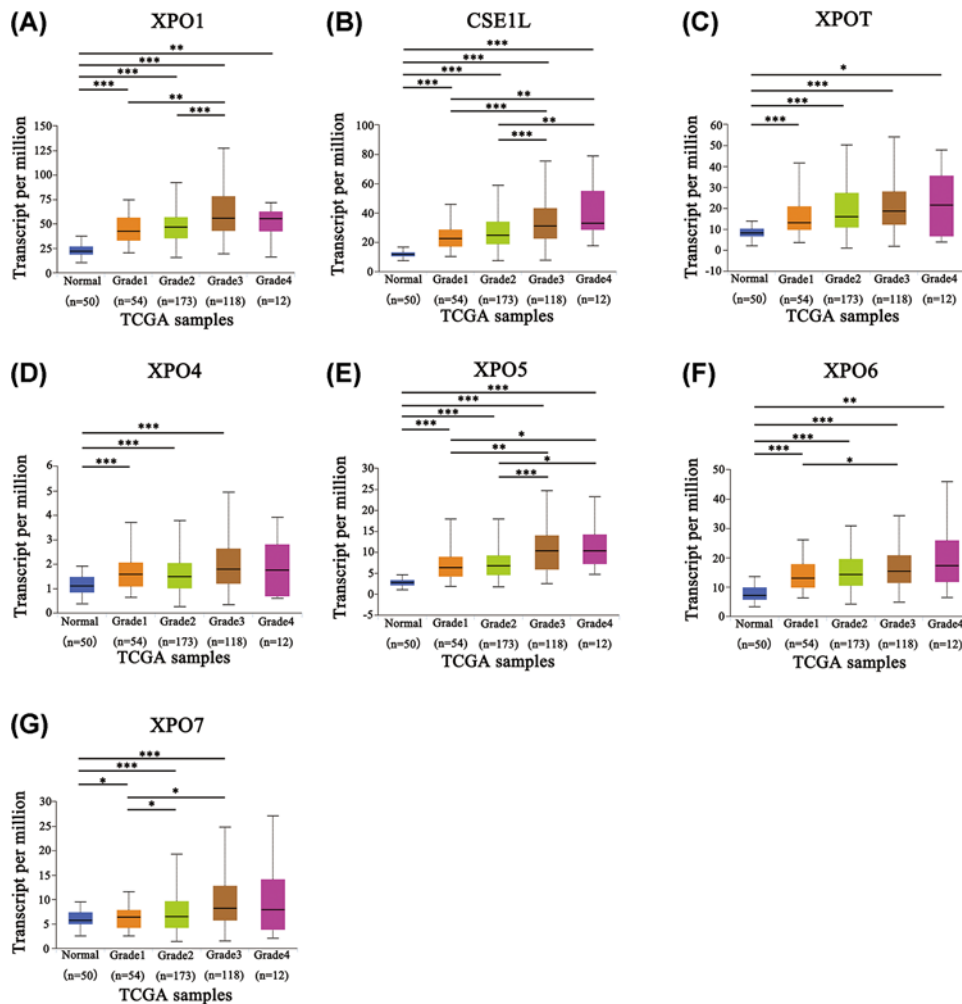

**Figure 4. Relationship between XPO mRNA expression and HCC pathological grade**

Expression panels for XPO1 (A), CSE1L (B), XPOT (C), XPO4 (D), XPO5 (E), XPO6 (F), and XPO7 (G) based on HCC tumor grade comparing the data between 50 normal individuals and 371 HCC patients in the TCGA database. Pathological grading: Grade 1, well-differentiated; grade 2, moderately differentiated; grade 3, poorly differentiated and grade 4: undifferentiated. \* $P < 0.05$ ; \*\* $P < 0.01$ ; \*\*\* $P < 0.001$ .

## Discussion

Currently, malignant tumors have been viewed as a set of diseases driven by the accumulation of genetic mutations and the disruption of epigenetic regulatory mechanisms [4,28]. Any alterations in XPO family members resulting from either genetic mutations or epigenetic changes could affect miRNA expression and consequently have profound effects on tumorigenesis [29,30]. Meanwhile, a growing body of studies have shown that the misregulation of nuclear export could result in various cancers [31–34]. Although some XPO family members have been confirmed to be related to HCC, their distinct roles remain to be elucidated. In the current study, the expression, mutations and prognostic values of XPOs in HCC were analyzed. We found that XPOs expression was up-regulated and correlated with tumor clinical stage, pathological grade and the prognosis of HCC. Moreover, frequent mutations in XPOs were observed and confirmed to be related to a worse prognosis in HCC.

XPO1 transports nearly 300 different cargo proteins across the nuclear envelope, including components in several key pathways that influence liver cancer growth and survival. For example, cancer cells utilize XPO1 to export p53, APC, p21, p27, Foxo, BRCA1, ATM and TopoI to the cytoplasm. Restriction of these key gatekeeper and caretaker proteins to the cytoplasmic compartment prevents them from suppressing tumor growth [35–37]. The overexpression of XPO1 has been found in various cancers, including liver, ovarian, pancreatic, gastric and lung carcinomas [13,38–41], and might serve as a potential prognostic indicator. In a human ovarian cancer study, it was found that

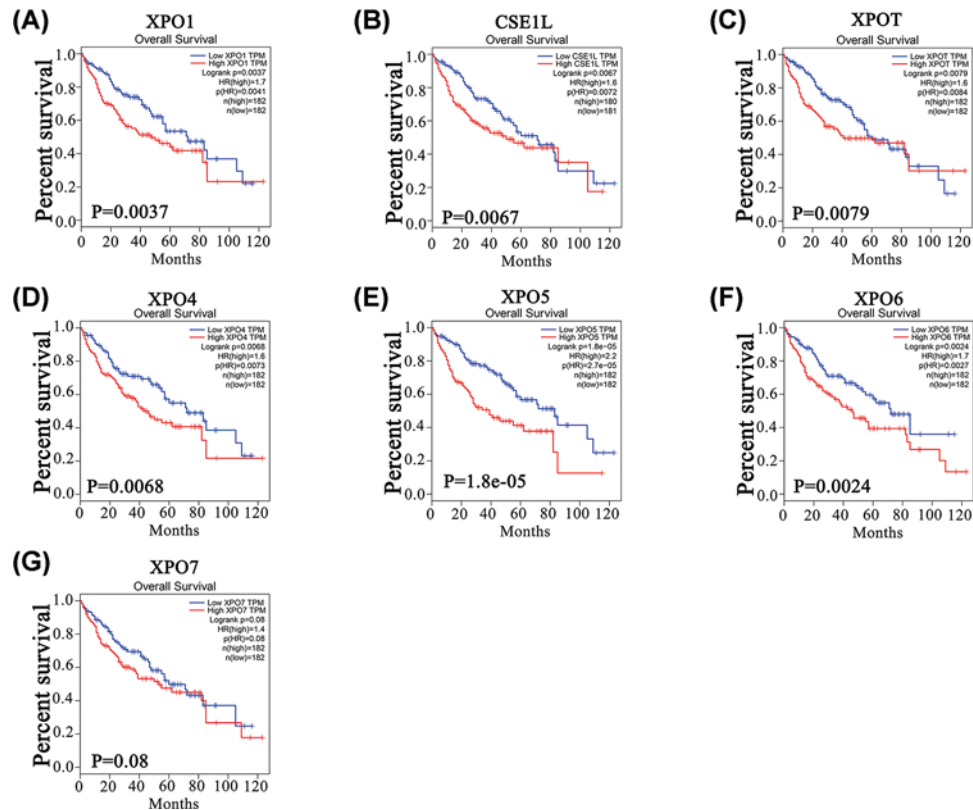

**Figure 5. OS difference based on XPO mRNA levels in HCC patients**

High XPO1, CSE1L, XPOT and XPO4/5/6 (A–F) mRNA expression levels were remarkably associated with poor OS in HCC patients, while that of XPO7 (G) was not ( $P=0.08$ , borderline significance).

the overexpression of XPO1 in the cytoplasm was prominently related to advanced tumor stage, poor differentiation and a higher mitotic rate, while higher XPO1 expression in the nucleus was associated with cyclooxygenase-2 expression and worse OS [42]. Similarly, Chen et al. [38] reported that XPO1 mRNA overexpression was correlated with decreased survival and platinum resistance in ovarian cancer. Thus, the inhibition of XPO1 is a promising therapeutic strategy for cancer treatment. KPT-330, a kind of selective inhibitor of nuclear export, could down-regulate XPO1 transcription and reduce the growth capability of HCC cells by increasing the expression of tumor suppressor proteins, such as p53 and p27, in the nucleus and reducing the concentration of oncogenes, such as c-Myc and c-Met [13]. Moreover, KPT-330 could cause the accumulation of p53 in the nucleus and the retention of p21 in the cytoplasm, which led to cell arrest and apoptosis in patients with gastric cancer [40]. Interestingly, KPT-330 can efficiently reverse anthracycline resistance by down-regulating XPO1 expression [43]. Azmi et al. [44] demonstrated that KPT-330 increased miR-145 expression in pancreatic ductal adenocarcinoma cells and inhibited tumor cell proliferation and migration capacities. Consistently, our analysis showed that XPO1 overexpression in HCC cancer tissues was correlated with poor pathological differentiation, advanced tumor clinical stage and a poor prognosis. Therapy targeting the XPO1 pathway might be a potential strategy to be explored.

CSE1L and its substrate, importin- $\alpha$  1, were found to be up-regulated and significantly associated with a worse prognosis in HCC. Further mechanistic studies have indicated that X-linked inhibitor of apoptosis and p53 collaboratively mediate CSE1L mRNA expression [45,46]. Wellmann et al. [47] reported that strong expression of CSE1L was not only positively associated with the degree of inflammation in hepatitis but also a key regulator in tumorigenesis in HCC. Another study indicated that CSE1L could interact with the gene mutS homolog-6 and was also associated with a poor prognosis in osteosarcoma patients [48]. Moreover, protein phosphatase-1 could interact with CSE1L to control the cell cycle and the proliferation of cancer cells through CSE1L dephosphorylation in colon adenocarcinoma [49]. In this study, the results suggested that CSE1L was overexpressed in HCC tissues and correlated with a poor prognosis. Further studies on the mechanism by which CSE1L promotes HCC progression are needed.



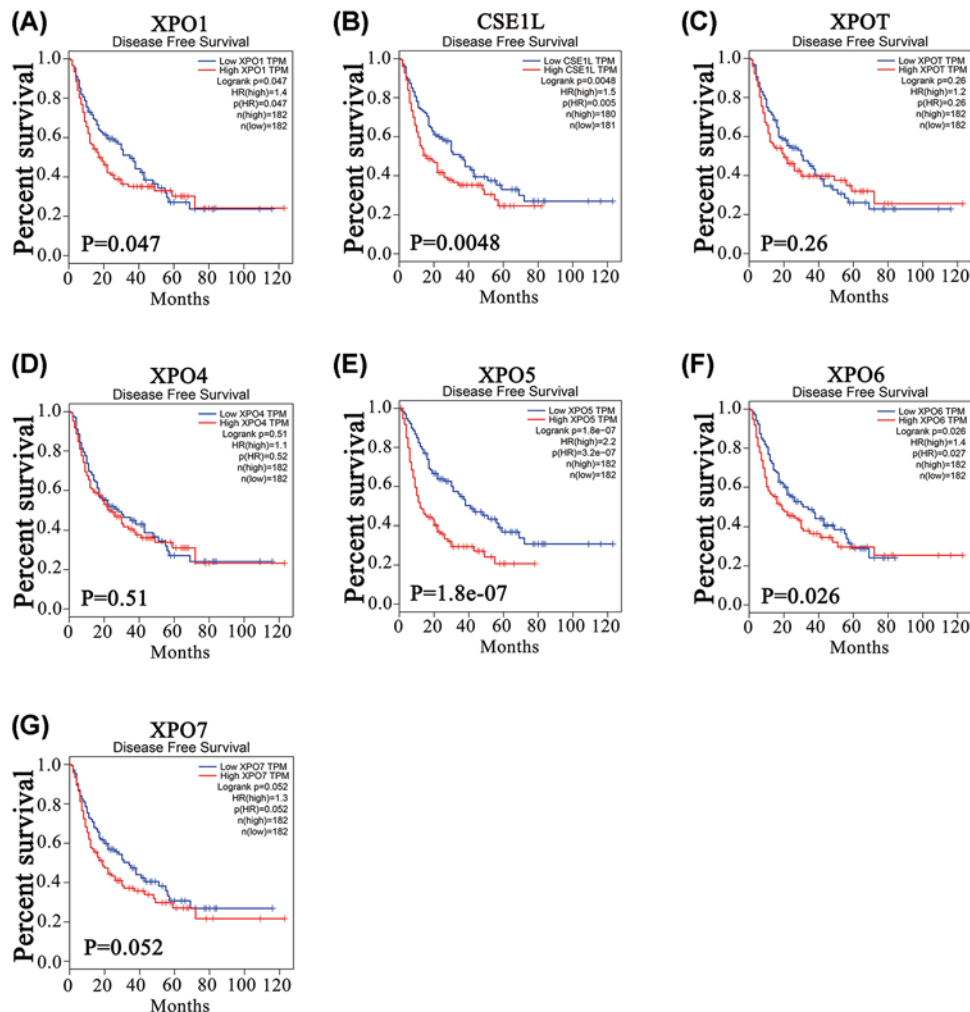

**Figure 6. DFS difference based on XPO mRNA levels in HCC patients**

High XPO1, CSE1L and XPO5/6 (A,B,E,F) mRNA expression levels were associated with poor DFS in HCC patients, while those of XPO4 (C,D) were not and that of XPO7 (G) was uncertain ( $P=0.052$ , borderline significance).

Significant up-regulation of XPOT (also named XPO7) was found in liver and breast cancers [14,32]. High expression of XPOT in 95 liver cancer tissues predicted a worse prognosis. The knockdown of XPOT caused cell cycle arrest in  $G_0/G_1$  phase by down-regulating cell cycle regulators, such as cyclin-dependent kinase-1 and cyclin A [14]. XPOT was also found to be increased and strongly related to worse OS in breast cancer [32]. Similar findings were found in studies regarding XPO4 [15,16,50]. Consistent with these results, our analyses from different datasets suggest that XPOT and XPO4 may serve as promising biomarkers for HCC prognosis.

Conflicting roles for XPO5 have been found in different kinds of human cancers. On one hand, the significant overexpression of XPO5 was found in breast, prostate and medullary thyroid carcinomas [32,51,52]. Excessive XPO5 overrode the inhibitory effect of canonical miRNA–mRNA regulation, which resulted in cellular protein instability, cellular proliferation and tumor development in prostate cancer [51]. Moreover, XPO5 was overexpressed in medullary thyroid carcinomas harboring RET mutations [52]. Consistent with these findings, our study showed that XPO5 overexpression was significantly related to HCC clinical stage, pathological grade and worse survival. On the other hand, decreased expression of XPO5 had been found in liver and bladder cancers [17,53]. The aberrant expression of XPO5 significantly suppressed cell proliferation, colony formation, growth in soft agar and tumorigenicity in nude mice collectively demonstrating that XPO5 functions as a tumor suppressor in the progression of HCC [17]. The up-regulation of XPO5 could down-regulate the expression of microRNAs including miR-21, which suppresses p53 function, and subsequently inhibit the development of bladder tumors [53]. The discrepancy in the roles of XPO5 described above may be due to the different tumor types and study models.

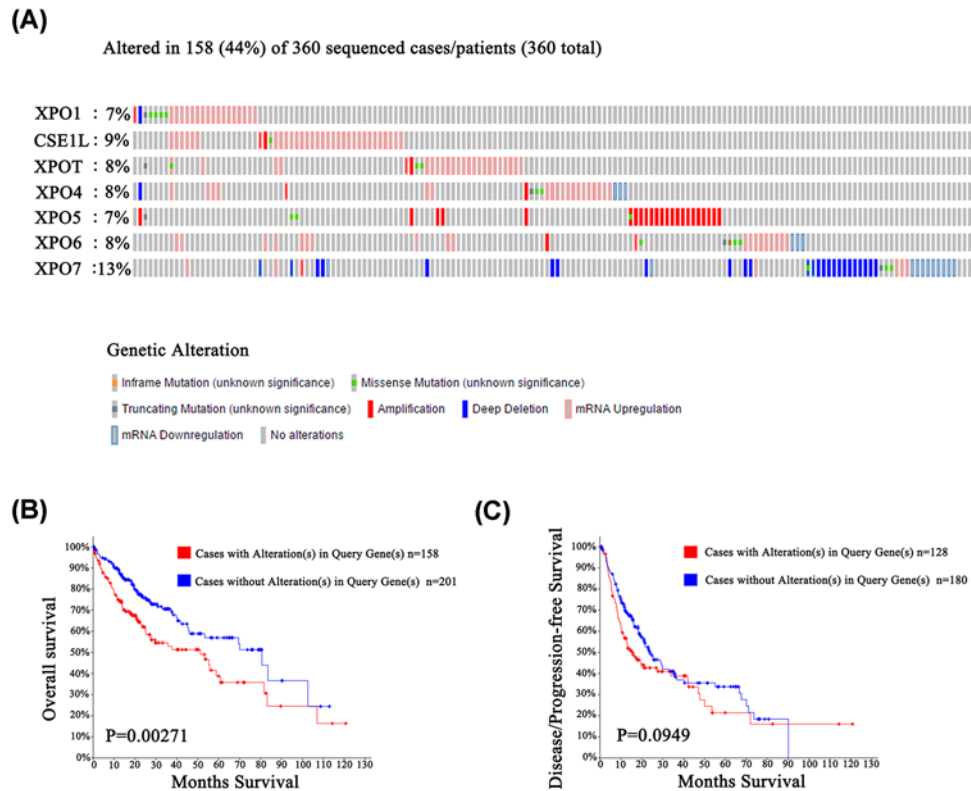

**Figure 7. XPO expression and mutation analysis in HCC**

(A) OncoPrint in c-BioPortal showed the distribution and proportion of samples with alterations in XPOs. (B) XPO alterations were associated with worse OS in HCC patients. (C) XPO alterations did not correlate with DFS in HCC patients.

XPO6 was overexpressed and associated with metastatic potential and a poor prognosis in prostate cancer tissue [54]. Consistent with these findings, our analysis revealed higher XPO6 mRNA expression in HCC cancerous tissues compared with paracancerous liver tissues, and it was significantly related to HCC clinical stage and pathological grade. XPO7 was recently reported to be down-regulated in both high-grade and low-grade differentiated tumors in epithelial ovarian carcinoma, and its low mRNA expression was associated with worse OS [55,56]. Interestingly, in the current study, significantly higher mRNA expression of XPO7 was found in HCC tissues and correlated with HCC clinical stage and pathological grade. Furthermore, we found that high XPO7 expression seemed to correlate with HCC prognosis (OS and DFS, borderline significance). Further experiments are needed to be performed to determine the exact role of XPO7 in HCC in the future.

Gene variants might modulate oxidative stress, iron metabolism, inflammatory and immune responses, DNA repair mechanisms and cell cycle regulation and consequently contribute to the tumorigenesis of HCC [57]. In the current study, the mutation frequency in XPO subunits was relatively high in HCC, and DNA sequence alterations mainly occurred in XPO7. In addition, the type of mutations may be associated with XPO mRNA expression levels. A previous study showed that DNA copy number amplifications could activate the mRNA expression levels of oncogenes [58]. More mRNA products could be found in genes with higher copy number variations and *vice versa* [59]. However, gene mutations are one of the many factors that affect transcriptional levels. Epigenetic changes, including DNA methylation, histone acetylation and methylation, noncoding RNAs, and post-translational modifications, are also main drivers involved in tumorigenesis independent of changes in the DNA sequence [60]. In the current analysis, we found that XPO mutations were related to mRNA up- or down-regulation, DNA amplification or deletion etc. These alterations were associated with OS in HCC patients. However, the potential molecular mechanism remains unclear and requires further investigation.

Therefore, we hypothesized that aberrant expression of XPOs may promote the proliferation and anti-apoptotic ability of HCC cells by enhancing the nuclear output of tumor suppressor factors (such as TP53) in the nucleus of HCC. On the other hand, we acknowledged that there were some limitations to our study. All data analyzed were retrieved from online databases. We did not perform further experiments on the potential mechanisms of XPOs in

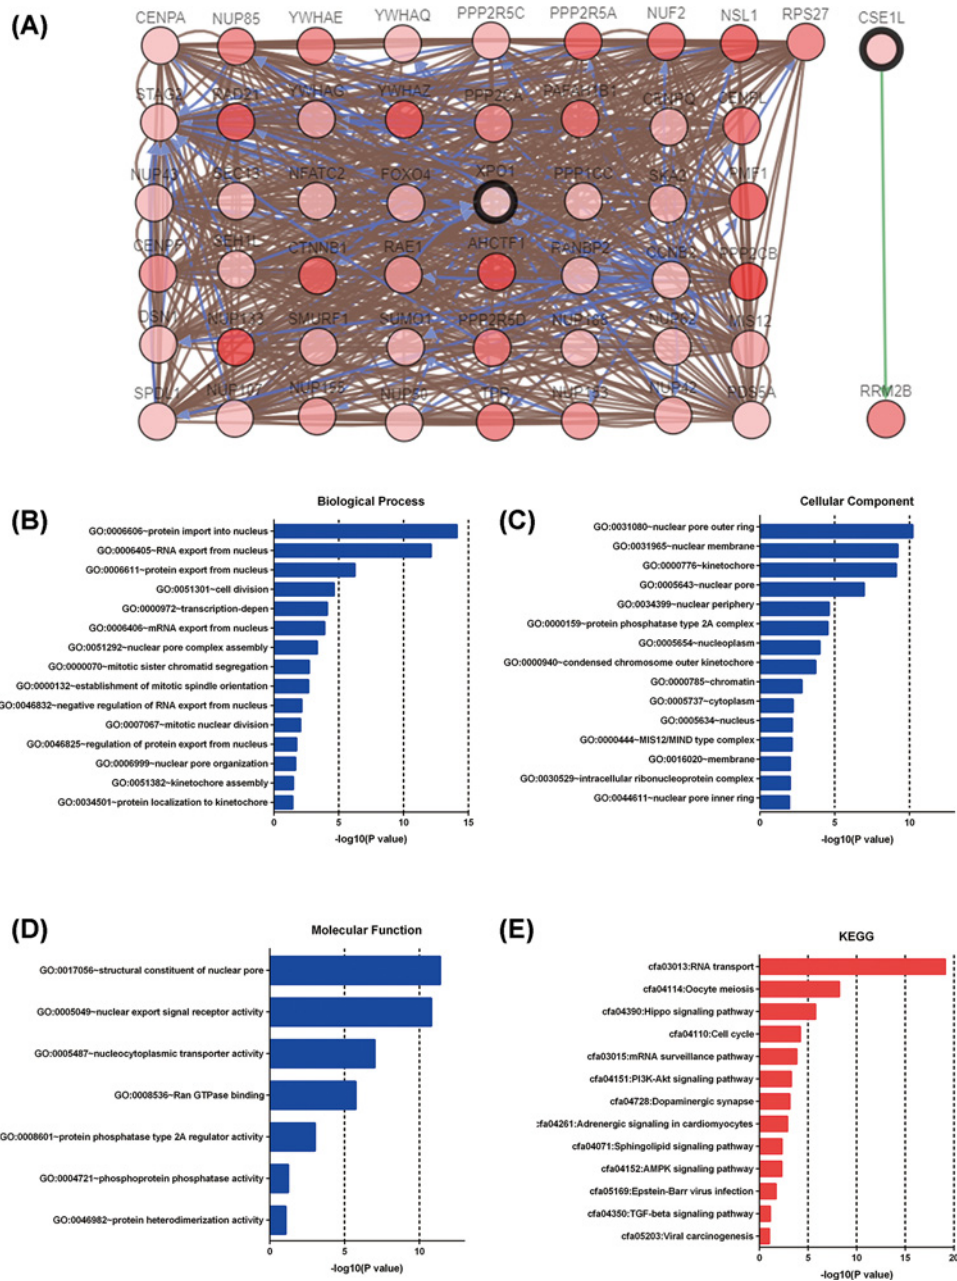

**Figure 8. GO enrichment and KEGG pathway analyses of XPOs**

(A) Networks constructed in c-BioPortal showed the interaction relationship between XPO1, CSE1L and the 50 most frequently altered neighboring genes. GO functional enrichment analysis predicted three main functions of the target genes: (B) biological process, (C) cellular components and (D) molecular functions. (E) KEGG pathway analysis of XPO1, CSE1L and their 50 most frequently altered neighboring genes.

HCC. Together with other findings discussed above, our analyses suggested that XPOs play oncogenic roles in HCC. Future studies including immunohistochemistry and experiments on HCC cell lines or animal models could be used to investigate the detailed mechanism between XPOs and HCC.

## Conclusion

Our results showed that XPO family members were significantly overexpressed in HCC tissues, and their mRNA levels were significantly correlated with the clinical stage and tumor pathological differentiation grade. High mRNA

expression of XPO1, CSE1L, XPOT and XPO4/5/6 significantly was correlated with OS, and high mRNA expression of XPO1, CSE1L and XPO5/6 was positively correlated with DFS. In addition, the mutation rate of XPO7 was the highest in HCC, and genetic changes in all XPOs examined were related to worse OS. These results suggest that XPOs might be potential biomarkers for predicting survival in HCC patients.

### Ethics statement

All datasets used in the present study were retrieved from published literature, and written informed consent was obtained. The study protocol was approved by the Ethics Committee of The Third Affiliated Hospital of Sun Yat-sen University for Human Study and conducted according to the principles of the Declaration of Helsinki.

### Author Contribution

Lubiao Chen, Yanlin Huang and Liang Zhou conceived and designed the study and drafted this manuscript. Yifan Lian, Jialiang Wang, Dongmei Chen, and Huan Wei analyzed the data, generated the figures and drafted the manuscript. Mingsheng Huang and Yuehua Huang interpreted the results and critically revised the manuscript. Yuehua Huang also provided funding. All authors have approved the final version of this manuscript.

### Competing Interests

The authors declare that there are no competing interests associated with the manuscript.

### Funding

This work was supported by the National Natural Science Foundation of China [grant number 81872006]; the Research and Development Key Planning Project of Guangdong Province [grant number 2019B110233002]; Project funded by China Postdoctoral Science Foundation [grant number 2019TQ0381] and the Natural Science Foundation of Guangdong Province [grant number 2018A030313592].

### Abbreviations

APC , Anaphase Promoting Complex or Cyclosome; ATM , Ataxia Telangiectasia Mutated; BRCA1 , Breast Cancer Type1 Susceptibility Protein; DAVID, Database for Annotation, Visualization and Integrated Discovery; DFS, disease-free survival; Foxo , Forkhead Box O; GEPIA, Gene Expression Profiling Interactive Analysis; GO, Gene Ontology; HCC, hepatocellular carcinoma; HEAT , Huntingtin, Elongation factor 3, protein phosphatase 2A (pp2A) and the yeast kinase TOR1; KEGG , Kyoto Encyclopedia of Genes and Genomes; OS , overall survival; RET, Rearranged during Transfection; TCGA , The Cancer Genome Atlas; XPO , exportin.

### References

- Bray, F., Ferlay, J., Soerjomataram, I., Siegel, R.L., Torre, L.A. and Jemal, A. (2018) Global cancer statistics 2018: GLOBOCAN estimates of incidence and mortality worldwide for 36 cancers in 185 countries. *CA Cancer J. Clin.* **68**, 394–424, <https://doi.org/10.3322/caac.21492>
- Daher, S., Massarwa, M., Benson, A.A. and Khoury, T. (2018) Current and future treatment of hepatocellular carcinoma: an updated comprehensive review. *J. Clin. Transl. Hepatol.* **6**, 69–78
- Balogh, J., Victor, D., Asham, E.H., Burroughs, S.G., Bektour, M., Saharia, A. et al. (2016) Hepatocellular carcinoma: a review. *J. Hepatocell. Carcinoma* **3**, 41–53, <https://doi.org/10.2147/JHC.S61146>
- Huang, Y., Wang, H., Lian, Y., Wu, X., Liang, Z., Wang, J. et al. (2018) Upregulation of kinesin family member 4A enhanced cell proliferation via activation of Akt signaling and predicted a poor prognosis in hepatocellular carcinoma. *Cell Death Dis.* **9**, 141, <https://doi.org/10.1038/s41419-017-0114-4>
- Okada, N., Ishigami, Y., Suzuki, T., Kaneko, A., Yasui, K., Fukutomi, R. et al. (2010) Importins and exportins in cellular differentiation. *J. Cell. Mol. Med.* **12**, 1863–1871
- Timney, B.L., Raveh, B., Mironska, R., Trivedi, J.M., Kim, S.J., Russel, D. et al. (2016) Simple rules for passive diffusion through the nuclear pore complex. *J. Cell Biol.* **215**, 57, <https://doi.org/10.1083/jcb.201601004>
- Mahipal, A. and Malafa, M. (2016) Importins and exportins as therapeutic targets in cancer. *Pharmacol. Ther.* **164**, 135–143, <https://doi.org/10.1016/j.pharmthera.2016.03.020>
- Michael, S. and Yuh Min, C. (2015) Nuclear localization signals for four distinct karyopherin- $\beta$  nuclear import systems. *Biochem. J.* **468**, 353–362, <https://doi.org/10.1042/BJ20150368>
- Kimura, M. and Imamoto, N. (2014) Biological significance of the importin- $\beta$  family-dependent nucleocytoplasmic transport pathways. *Traffic* **15**, 727–748, <https://doi.org/10.1111/tra.12174>
- Irfana, M., Michael, K., Sharon, S., Mohammad, R.M. and Azmi, A.S. (2014) Understanding XPO1 target networks using systems biology and mathematical modeling. *Curr. Pharm. Des.* **20**, 56–65, <https://doi.org/10.2174/13816128113199990611>
- Yuh Min, C. and Süel, K.E. (2011) Nuclear import by karyopherin- $\beta$ s: recognition and inhibition. *Biochim. Biophys. Acta* **1813**, 1593–1606, <https://doi.org/10.1016/j.bbamcr.2010.10.014>

- 12 Yin, L., Wang, Y., Guo, X., Xu, C. and Yu, G. (2018) Comparison of gene expression in liver regeneration and hepatocellular carcinoma formation. *Cancer Manag. Res.* **10**, 5691–5708, <https://doi.org/10.2147/CMAR.S172945>
- 13 Zheng, Y., Gery, S., Sun, H., Shacham, S. and Kauffman, M. (2014) KPT-330 inhibitor of XPO1-mediated nuclear export has anti-proliferative activity in hepatocellular carcinoma. *Cancer Chemother. Pharmacol.* **74**, 487–495, <https://doi.org/10.1007/s00280-014-2495-8>
- 14 Lin, J., Hou, Y., Huang, S., Wang, Z., Sun, C., He, X. et al. (2019) Exportin-T promotes tumor proliferation and invasion in hepatocellular carcinoma. *Mol. Carcinog.* **58**, 293–304, <https://doi.org/10.1002/mc.22928>
- 15 Zhang, H., Wei, S., Ning, S., Jie, Y., Yukang, R.U. and Yuchun, G.U. (2013) Evaluation of TGF $\beta$ , XPO4, eIF5A2 and ANGPTL4 as biomarkers in HCC. *Exp. Ther. Med.* **5**, 119–127
- 16 Liang, X.-T., Pan, K., Chen, M.-S., Li, J.-J., Wang, H., Zhao, J.-J. et al. (2015) Decreased expression of XPO4 is associated with poor prognosis in hepatocellular carcinoma. *J. Gastroenterol. Hepatol.* **26**, 544–549
- 17 Li, Y., Wang, X., He, B., Cai, H. and Gao, Y. (2016) Downregulation and tumor-suppressive role of XPO5 in hepatocellular carcinoma. *Mol. Cell. Biochem.* **415**, 197–205
- 18 Rhodes, D.R., Yu, J., Shanker, K., Deshpande, N., Varambally, R., Ghosh, D. et al. (2004) ONCOMINE: a cancer microarray database and integrated data-mining platform. *Neoplasia* **6**, 1–6, [https://doi.org/10.1016/S1476-5586\(04\)80047-2](https://doi.org/10.1016/S1476-5586(04)80047-2)
- 19 Chandrashekar, D.S., Bashel, B., Balasubramanya, S.A.H., Creighton, C.J., Ponce-Rodriguez, I., Chakravarthi, B. et al. (2017) UALCAN: a portal for facilitating tumor subgroup gene expression and survival analyses. *Neoplasia* **19**, 649–658, <https://doi.org/10.1016/j.neo.2017.05.002>
- 20 Tang, Z., Li, C., Kang, B., Gao, G. and Zhang, Z. (2017) GEPIA: a web server for cancer and normal gene expression profiling and interactive analyses. *Nucleic Acids Res.* **45**, W98–W102, <https://doi.org/10.1093/nar/gkx247>
- 21 Katarzyna, T., Patrycja, C. and Maciej, W. (2015) The Cancer Genome Atlas (TCGA): an immeasurable source of knowledge. *Contemp. Oncol.* **19**, 68–77
- 22 Gao, J., Aksoy, B.A., Dogrusoz, U., Dressner, G., Gross, B., Sumer, S.O. et al. (2013) Integrative analysis of complex cancer genomics and clinical profiles using the cBioPortal. *Sci. Signal.* **6**, pl1
- 23 Sherman, B.T., Da, W.H., Tan, Q., Guo, Y., Bour, S., Liu, D. et al. (2007) DAVID Knowledgebase: a gene-centered database integrating heterogeneous gene annotation resources to facilitate high-throughput gene functional analysis. *BMC Bioinformatics* **8**, 426, <https://doi.org/10.1186/1471-2105-8-426>
- 24 Roessler, S., Jia, H.-L., Budhu, A., Forgues, M., Ye, Q.-H., Lee, J.-S. et al. (2010) A unique metastasis gene signature enables prediction of tumor relapse in early-stage hepatocellular carcinoma patients. *Cancer Res.* **70**, 10202–10212, <https://doi.org/10.1158/0008-5472.CAN-10-2607>
- 25 Wurmbach, E., Chen, Y.-B., Khitrov, G., Zhang, W., Roayaie, S., Schwartz, M. et al. (2010) Genome-wide molecular profiles of HCV-induced dysplasia and hepatocellular carcinoma. *Hepatology* **45**, 938–947
- 26 Chen, X., Cheung, S.T., So, S., Fan, S.T., Barry, C., Higgins, J. et al. (2002) Gene expression patterns in human liver cancers. *Mol. Biol. Cell* **13**, 1929–1939, <https://doi.org/10.1091/mbc.02-02-0023>
- 27 Mas, V.R., Maluf, D.G., Archer, K.J., Yanek, K., Kong, X., Kulik, L. et al. (2009) Genes involved in viral carcinogenesis and tumor initiation in hepatitis C virus-induced hepatocellular carcinoma. *Mol. Med.* **15**, 85–94, <https://doi.org/10.2119/molmed.2008.00110>
- 28 Lian, Y.F., Huang, Y.L., Wang, J.L., Deng, M.H., Xia, T.L., Zeng, M.S. et al. (2018) Anillin is required for tumor growth and regulated by miR-15a/miR-16-1 in HBV-related hepatocellular carcinoma. *Aging (Albany N.Y.)* **10**, 1884–1901, <https://doi.org/10.18632/aging.101510>
- 29 Jardin, F., Pujals, A., Pelletier, L., Bohers, E., Camus, V., Mareschal, S. et al. (2016) Recurrent mutations of the exportin 1 gene (XPO1) and their impact on selective inhibitor of nuclear export compounds sensitivity in primary mediastinal B-cell lymphoma. *Am. J. Hematol.* **91**, 923–930, <https://doi.org/10.1002/ajh.24451>
- 30 Wu, K., He, J., Pu, W. and Peng, Y. The role of Exportin-5 in microRNA biogenesis and cancer. *Genomics Proteomics Bioinformatics* **16**, 120–126, <https://doi.org/10.1016/j.gpb.2017.09.004>
- 31 Turner, J.G., Dawson, J. and Sullivan, D.M. (2012) Nuclear export of proteins and drug resistance in cancer. *Biochem. Pharmacol.* **83**, 1021–1032, <https://doi.org/10.1016/j.bcp.2011.12.016>
- 32 Vaidyanathan, S., Thangavelu, P.U. and Duijf, P.H.G. (2016) Overexpression of Ran GTPase components regulating nuclear export, but not mitotic spindle assembly, marks chromosome instability and poor prognosis in breast cancer. *Target. Oncol.* **11**, 1–10, <https://doi.org/10.1007/s11523-016-0432-y>
- 33 Shigeyasu, K., Okugawa, Y., Toden, S., Boland, C.R. and Goel, A. (2017) Exportin-5 functions as an oncogene and a potential therapeutic target in colorectal cancer. *Clin. Cancer Res.* **23**, 1312, <https://doi.org/10.1158/1078-0432.CCR-16-1023>
- 34 Han, Y., Liu, Y., Gui, Y. and Cai, Z. (2013) Inducing cell proliferation inhibition and apoptosis via silencing Dicer, Drosha, and Exportin 5 in urothelial carcinoma of the bladder. *J. Surg. Oncol.* **107**, 201–205, <https://doi.org/10.1002/jso.23214>
- 35 Kau, T.R., Way, J.C. and Silver, P.A. (2004) Nuclear transport and cancer: from mechanism to intervention. *Nat. Rev. Cancer* **4**, 106, <https://doi.org/10.1038/nrc1274>
- 36 Nigg, E.A. (1997) Nucleocytoplasmic transport: signals, mechanisms and regulation. *Nature* **386**, 779–787, <https://doi.org/10.1038/386779a0>
- 37 Gorlich, D. and Kutay, U. (1999) Transport between the cell nucleus and the cytoplasm. *Ann. Rev. Cell Dev. Biol.* **15**, 607
- 38 Martignetti, J.A., Chen, Y., Camacho, C., Silvers, T.R., Razak, A.R., Gabrail, N.Y. et al. (2017) Inhibition of the nuclear export receptor XPO1 as a therapeutic target for platinum resistant ovarian Cancer. *Clin. Cancer Res.* **23**, 1552, <https://doi.org/10.1158/1078-0432.CCR-16-1333>
- 39 Muqbil, I., Azmi, A.S. and Mohammad, R.M. (2018) Nuclear export inhibition for pancreatic cancer therapy. *Cancers (Basel)* **10**, pii: E138, <https://doi.org/10.3390/cancers10050138>
- 40 Subhash, V.V., Mei, S.Y., Wang, L., Shi, H.T., Wong, F.Y., Thuya, W.L. et al. (2018) Anti-tumor efficacy of Selinexor (KPT-330) in gastric cancer is dependent on nuclear accumulation of p53 tumor suppressor. *Sci. Rep.* **8**, 12248, <https://doi.org/10.1038/s41598-018-30686-1>

- 41 Garg, M., Kanojia, D., Mayakonda, A., Ganesan, T.S., Sadhanandhan, B., Suresh, S. et al. (2017) Selinexor (KPT-330) has antitumor activity against anaplastic thyroid carcinoma in vitro and in vivo and enhances sensitivity to doxorubicin. *Sci. Rep.* **7**, 9749, <https://doi.org/10.1038/s41598-017-10325-x>
- 42 Aurelia, N., Wilko, W., Silvia, N., Annika, R.S., Ann-Christin, B., Ines, K. et al. (2010) Expression of the nuclear export protein chromosomal region maintenance/exportin 1/Xpo1 is a prognostic factor in human ovarian cancer. *Cancer* **112**, 1733–1743
- 43 Saenzponce, N., Pillay, R., Long, L.M.D., Kashyap, T., Argueta, C., Landesman, Y. et al. (2018) Targeting the XPO1-dependent nuclear export of E2F7 reverses anthracycline resistance in head and neck squamous cell carcinomas. *Sci. Transl. Med.* **10**, pii: eaar7223, <https://doi.org/10.1126/scitranslmed.aar7223>
- 44 Azmi, A.S., Li, Y., Muqbil, I., Aboukameel, A., Senapedis, W., Baloglu, E. et al. (2017) Exportin 1 (XPO1) inhibition leads to restoration of tumor suppressor miR-145 and consequent suppression of pancreatic cancer cell proliferation and migration. *Oncotarget* **8**, 82144–82155, <https://doi.org/10.18632/oncotarget.19285>
- 45 Juliane, W., Alessandro, O., Kerstin, H., Carsten, S., Daniel, D., Eva Maria, E. et al. (2015) Prosurvival function of the cellular apoptosis susceptibility/importin- $\alpha$ 1 transport cycle is repressed by p53 in liver cancer. *Hepatology* **60**, 884–895
- 46 Tai, C.J., Hsu, C.H., Shen, S.C., Lee, W.R. and Jiang, M.C. (2010) Cellular apoptosis susceptibility (CSE1L/CAS) protein in cancer metastasis and chemotherapeutic drug-induced apoptosis. *J. Exp. Clin. Cancer Res.* **29**, 110
- 47 Wellmann, A., Flemming, P., Behrens, P., Wuppermann, K., Lang, H., Oldhafer, K. et al. (2001) High expression of the proliferation and apoptosis associated CSE1L/CAS gene in hepatitis and liver neoplasms: correlation with tumor progression. *Int. J. Mol. Med.* **7**, 489
- 48 Cheng, D.D., Lin, H.C., Li, S.J., Yao, M., Yang, Q.C. and Fan, C.Y. (2017) CSE1L interaction with MSH6 promotes osteosarcoma progression and predicts poor patient survival. *Sci. Rep.* **7**, 46238, <https://doi.org/10.1038/srep46238>
- 49 Sugiura, T., Noguchi, Y., Sakurai, K. and Hattori, C. (2008) Protein phosphatase 1H, overexpressed in colon adenocarcinoma, is associated with CSE1L. *Cancer Biol. Ther.* **7**, 285–292
- 50 Lars, Z., Wen, X., Johannes, Z., Semighini, C.P., Alexander, K., Beicong, M. et al. (2008) An oncogenomics-based *in vivo* RNAi screen identifies tumor suppressors in liver cancer. *Cell* **135**, 852–864, <https://doi.org/10.1016/j.cell.2008.09.061>
- 51 Höti, N., Yang, S., Aiyetan, P., Kumar, B., Hu, Y., Clark, D. et al. (2017) Overexpression of Exportin-5 overrides the inhibitory effect of miRNAs regulation control and stabilize proteins via posttranslation modifications in prostate cancer. *Neoplasia* **19**, 817, <https://doi.org/10.1016/j.neo.2017.07.008>
- 52 Cinzia, P., Cosimo, D., Marialuisa, S., Antonella, V., Valeria, P., Elisa, L. et al. (2014) Overexpression of genes involved in miRNA biogenesis in medullary thyroid carcinomas with RET mutation. *Endocrine* **47**, 528–536, <https://doi.org/10.1007/s12020-014-0204-3>
- 53 Catto, J.W.F., Saiful, M., Owen, H.C., Helen, B., Katie, M., Ewa, D. et al. (2009) Distinct microRNA alterations characterize high- and low-grade bladder cancer. *Cancer Res.* **69**, 8472–8481, <https://doi.org/10.1158/0008-5472.CAN-09-0744>
- 54 Hao, J., Chiang, Y.T., Gout, P.W. and Wang, Y. (2016) Elevated XPO6 expression as a potential prognostic biomarker for prostate cancer recurrence. *Front. Biosci.* **8**, 44, <https://doi.org/10.2741/s445>
- 55 Aksu, M., Pleiner, T., Karaca, S., Kappert, C., Dehne, H.J., Seibel, K. et al. (2018) Xpo7 is a broad-spectrum exportin and a nuclear import receptor. *J. Cell Biol.* **217**, 2329, <https://doi.org/10.1083/jcb.201712013>
- 56 Cáceres-Gorriti, K.Y., Carmona, E., Barrès, V., Rahimi, K., Létourneau, I.J., Tonin, P.N. et al. (2014) RAN nucleo-cytoplasmic transport and mitotic spindle assembly partners XPO7 and TPX2 are new prognostic biomarkers in serous epithelial ovarian cancer. *PLoS ONE* **9**, e91000, <https://doi.org/10.1371/journal.pone.0091000>
- 57 Nahon, P. and Zucman-Rossi, J. (2012) Single nucleotide polymorphisms and risk of hepatocellular carcinoma in cirrhosis. *J. Hepatol.* **57**, 663–674, <https://doi.org/10.1016/j.jhep.2012.02.035>
- 58 Myllykangas, S., Bohling, T. and Knuutila, S. (2007) Specificity, selection and significance of gene amplifications in cancer. *Semin. Cancer Biol.* **17**, 42–55, <https://doi.org/10.1016/j.semcancer.2006.10.005>
- 59 Orozco, L.D., Cokus, S.J., Ghazalpour, A., Ingram-Drake, L., Wang, S., van Nas, A. et al. (2009) Copy number variation influences gene expression and metabolic traits in mice. *Hum. Mol. Genet.* **18**, 4118–4129, <https://doi.org/10.1093/hmg/ddp360>
- 60 Kagohara, L.T., Stein-O'Brien, G.L., Kelley, D., Flam, E., Wick, H.C., Danilova, L.V. et al. (2018) Epigenetic regulation of gene expression in cancer: techniques, resources and analysis. *Brief. Funct. Genomics* **17**, 49–63, <https://doi.org/10.1093/bfpg/elx018>
